# Supplementary material for: Ruminal Microbiota Determines the High-Fiber Utilization of Ruminants: Evidence from the Ruminal Microbiota Transplant
Source: PubMed Central journal article supplement (PMC9430676; doi:10.1128/spectrum.00446-22), 2022-08-04
Supplement: spectrum.00446-22-s0001.pdf [file spectrum.00446-22-s0001.pdf]

**Ruminal microbiota determined the high fibre utilization of ruminants: evidence from the ruminal microbiota transplant**

Xiaodong Chen <sup>a</sup>, Fang Yan <sup>a</sup>, Tao Liu <sup>a</sup>, Yuanling Zhang <sup>a</sup>, Xinyi Li <sup>a, b</sup>, Mengya Wang <sup>a</sup>, Chenguang Zhang <sup>a</sup>, Xiurong Xu <sup>a</sup>, Lu Deng <sup>a, #</sup>, Junhu Yao <sup>a, #</sup>, and Shengru Wu <sup>a, #</sup>

<sup>a</sup> College of Animal Science and Technology, Northwest A&F University, Yangling, Shaanxi, China

<sup>b</sup> Department of Medicine, Karolinska Institutet, Solna, Stockholm, Sweden

Running Head: The high fibre utilization of ruminants

# Address correspondence to Shengru Wu, Email: [wushengru2013@163.com](mailto:wushengru2013@163.com); Junhu

Yao, Email: [yaojunhu2004@sohu.com](mailto:yaojunhu2004@sohu.com); Lu Deng, Email: [denglu128128@163.com](mailto:denglu128128@163.com);

Xiaodong Chen, Fang Yan and Tao Liu contributed equally to this work.

## Supplementary Material

### **FIG S1. Comparison of identified genera between the ruminal microbiota of dairy**

### **goats and microbiota of the small intestine and colon in mice. (A)**

Differences in the relative abundance of bacterial genus level between the rumen microbiota from goats and the small intestinal microbiota and the colonic microbiota from mice.

(B-C) The differential bacteria at the GENUS level ( $P < 0.05$ ) between the rumen microbiota from goats and the small intestinal microbiota from mice (B), and the rumen microbiomes from goats and the colonic microbiomes from mice (C). The Mann-Whitney U test was used to identify significantly different bacteria. All bacteria listed here were significantly differential bacteria with  $P < 0.05$  between the two groups.

All the data were expressed as the means with the standard deviation.

### **FIG S2. The high-fibre diet feeding significantly changed the ruminal bacterial composition of dairy goats when compared to low-fibre diets feeding. The**

differential bacteria in the rumen microbiota at the phylum level (A) and the genus level

(B) between HFg (goats with high fibre diets) and LFg (goats with low fibre diets) groups. The Mann-Whitney U test was used to identify significantly different bacteria.

All bacteria listed here were significantly differential bacteria with  $P < 0.05$  between the two groups. All the data were expressed as the means with the standard deviation.

### **FIG S3. Effect of high- and low-fibre diets on the intestinal microbiota of mice.**

(A-B) The differential bacteria at the phylum level of the small intestine (A) and of the colon (B) between the HFm (high fibre fed mice) and LFm (low fibre fed mice) groups'

mice. The Mann-Whitney U test was used to identify significantly different bacteria. All bacteria listed here were significantly differential bacteria with  $P < 0.05$  between the two groups. All the data were expressed as the means with the standard deviation. (C-D) Differences in the relative abundance of the small intestinal bacterial genera (C) and the colonic bacterial genera (D) between HFm and LFm groups' mice.

**FIG S4. Effects of ruminal microbiota transplant on the significantly changed growth performance and intestinal microbial composition of antibiotics pre-treated mice that fed with high fibre diet when compared with the antibiotics pre-treated mice fed with high fibre diet but without RMT treatment.**

(A) Effects of ruminal microbiota transplant on the weight of antibiotics pre-treated mice fed with high fibre diet when compared with the antibiotics pre-treated mice fed with high fibre diet but without RMT treatment. The data were analyzed using the ANOVA test. If a significant treatment effect was observed by ANOVA, the significant difference between treatments was identified by Duncan's multiple comparisons test. All the data were expressed as the means with the standard error.

(B-C) The Chao 1 index (B) and the Shannon index (C) of the small intestine bacterial community of mice among the Anti\_HFm (antibiotics pre-treated mice fed with high fibre diets only) group, the Anti\_HFg\_HFm (antibiotics pre-treated mice that receive ruminal microbiota from high fibre fed goats and meanwhile fed with high fibre diets) group, and Anti\_LFg\_HFm (antibiotics pre-treated mice that receive ruminal microbiota from low fibre fed goats and meanwhile fed with high fibre diets) group.

(D-E) The Chao 1 index (D) and the Shannon index (E) of the colonic bacterial community of mice among the Anti\_HFm group, the Anti\_HFg\_HFm group, and the Anti\_LFg\_HFm group. The data of (B-E) were statistically analyzed using the Kruskal-Wallis test with Dunn's post-hoc test.

(F) Principal Coordinates Analysis (PCoA) of the small intestine bacterial community of mice among the Anti\_HFm group, the Anti\_HFg\_HFm, and Anti\_LFg\_HFm groups.

(G) The small intestinal microbial weighted UniFrac ANOSIM distances among the Anti\_HFm group, the Anti\_HFg\_HFm group, and the Anti\_LFg\_HFm group.

(H) Principal Coordinates Analysis (PCoA) of the colonic bacterial community of mice among the Anti\_HFm group, the Anti\_HFg\_HFm group, and the Anti\_LFg\_HFm group.

(I) The colonic microbial weighted UniFrac ANOSIM distances among the Anti\_HFm group, the Anti\_HFg\_HFm group, and the Anti\_LFg\_HFm group. The data of (F) and (H) were statistically analyzed based on ANOSIM analysis. The data of (G) and (I) were statistically analyzed using the Kruskal-Wallis test with Dunn's post-hoc test.

(J-K) Differences in the relative abundance of the small intestinal bacterial at the phylum level (J) and genus level (K) among the Anti\_HFm group, the Anti\_HFg\_HFm group, and the Anti\_LFg\_HFm group.

(L-M) Differences in the relative abundance of the colonic bacterial at the phylum level (L) and genus level (M) among the Anti\_HFm group, the Anti\_HFg\_HFm group, and the Anti\_LFg\_HFm group.

**FIG S5. Significantly differential bacteria between antibiotic-treated mice**

**receiving RMT treatment when compared with the antibiotic-treated mice without RMY when they all received a high fibre diet.**

(A-B) The small intestinal differential bacteria at the phylum level (A) and the genus level (B) among Anti\_HFm (antibiotics pre-treated mice fed with high fibre diets only) group, the Anti\_HFg\_HFm (antibiotics pre-treated mice that receive ruminal microbiota from high fibre fed goats and meanwhile fed with high fibre diets) group, and Anti\_LFg\_HFm (antibiotics pre-treated mice that receive ruminal microbiota from low fibre fed goats and meanwhile fed with high fibre diets) group.

(C-D) The colonic differential bacteria at the phylum level (C) and the genus level (D) among the Anti\_HFm group, the Anti\_HFg\_HFm group, and the Anti\_LFg\_HFm group. The data of (A-D) were statistically analyzed using the Kruskal-Wallis test with Dunn's post-hoc test. All the data were expressed as the means with the standard deviation.

(E) The shared differential bacteria in the small intestine of mice among the Anti\_HFm group, the Anti\_HFg\_HFm group, and the Anti\_LFg\_HFm group.

(F) The shared differential bacteria in the colon of mice among the Anti\_HFm group, the Anti\_HFg\_HFm group, and the Anti\_LFg\_HFm group. The Mann-Whitney U test was used to identify significantly different bacteria. All bacteria listed here were significantly different bacteria with  $P < 0.05$  between the two groups. All data in the heat map are processed by  $\log_{10}$  and standardized.

The shared differential bacteria in “Anti\_HFm vs Anti\_HFg\_HFm” and “Anti\_HFm vs Anti\_LFg\_HFm” were marked purple.

The shared differential bacteria in “Anti\_HFm vs Anti\_HFg\_HFm” and

“Anti\_HFg\_HFm vs Anti\_LFg\_HFm” were marked green.

The shared differential bacteria in “Anti\_HFm vs Anti\_LFg\_HFm” and “Anti\_HFg\_HFm vs Anti\_LFg\_HFm” were marked yellow.

**FIG S6. Function prediction of intestinal and colonic microbiota among the Anti\_HFm group, the Anti\_HFg\_HFm group, and the Anti\_LFg\_HFm group.**

(A) Prediction of the differential function related to energy metabolism of the small intestinal microbes among Anti\_HFm group, the Anti\_HFg\_HFm group, and the Anti\_LFg\_HFm group based on multiple MetaCyc pathways using PICRUSt2.

(B) Prediction of the differential function related to the energy metabolism of the colonic microbes among the Anti\_HFm group, the Anti\_HFg\_HFm group, and Anti\_LFg\_HFm group based on multiple MetaCyc pathways using PICRUSt2. The Mann-Whitney U test was used to rank pathways in (A) and (B) that were significantly differentially ( $P < 0.05$ ) changed in predicted metagenome pathways analysis.

**Supplementary Table S1. Differential bacteria at the phylum level in the comparison group appear in this paper.**

**Supplementary Table S2. Differential bacteria at the genus level in the comparison group appear in this paper.**

**Supplementary Table S3. Ingredients and nutrient composition of the HFg and LFg groups on a dry matter (DM) basis.**

**Supplementary Table S4. The statistics of obtained sequences data of 16S RNA gene sequencing in the present study.**

# Supplementary Material

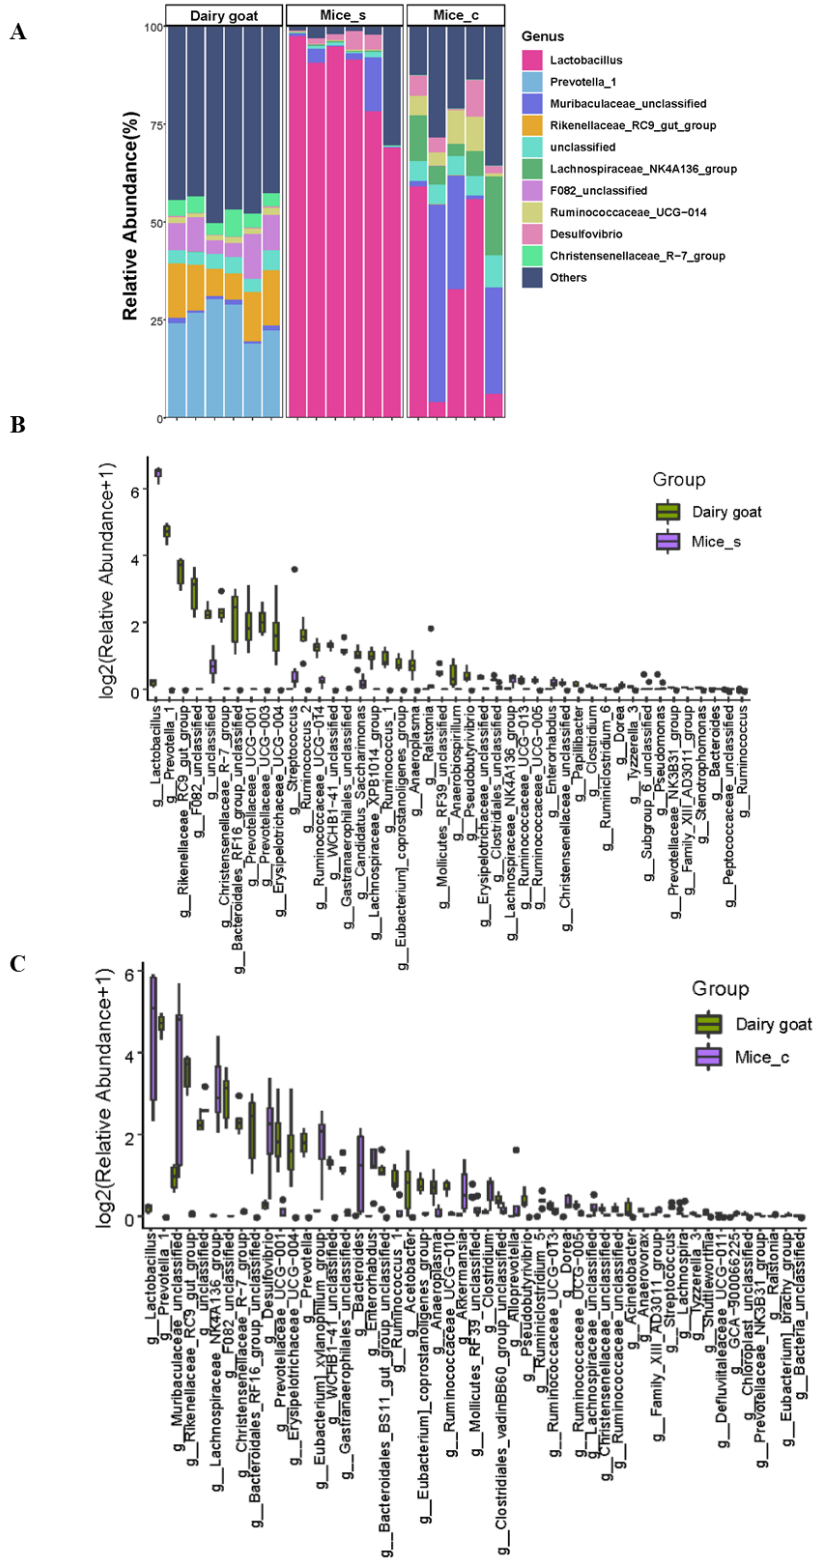

**FIG S1.** Comparison of identified genera between the ruminal microbiota of dairy goats and microbiota of the small intestine and colon in mice.





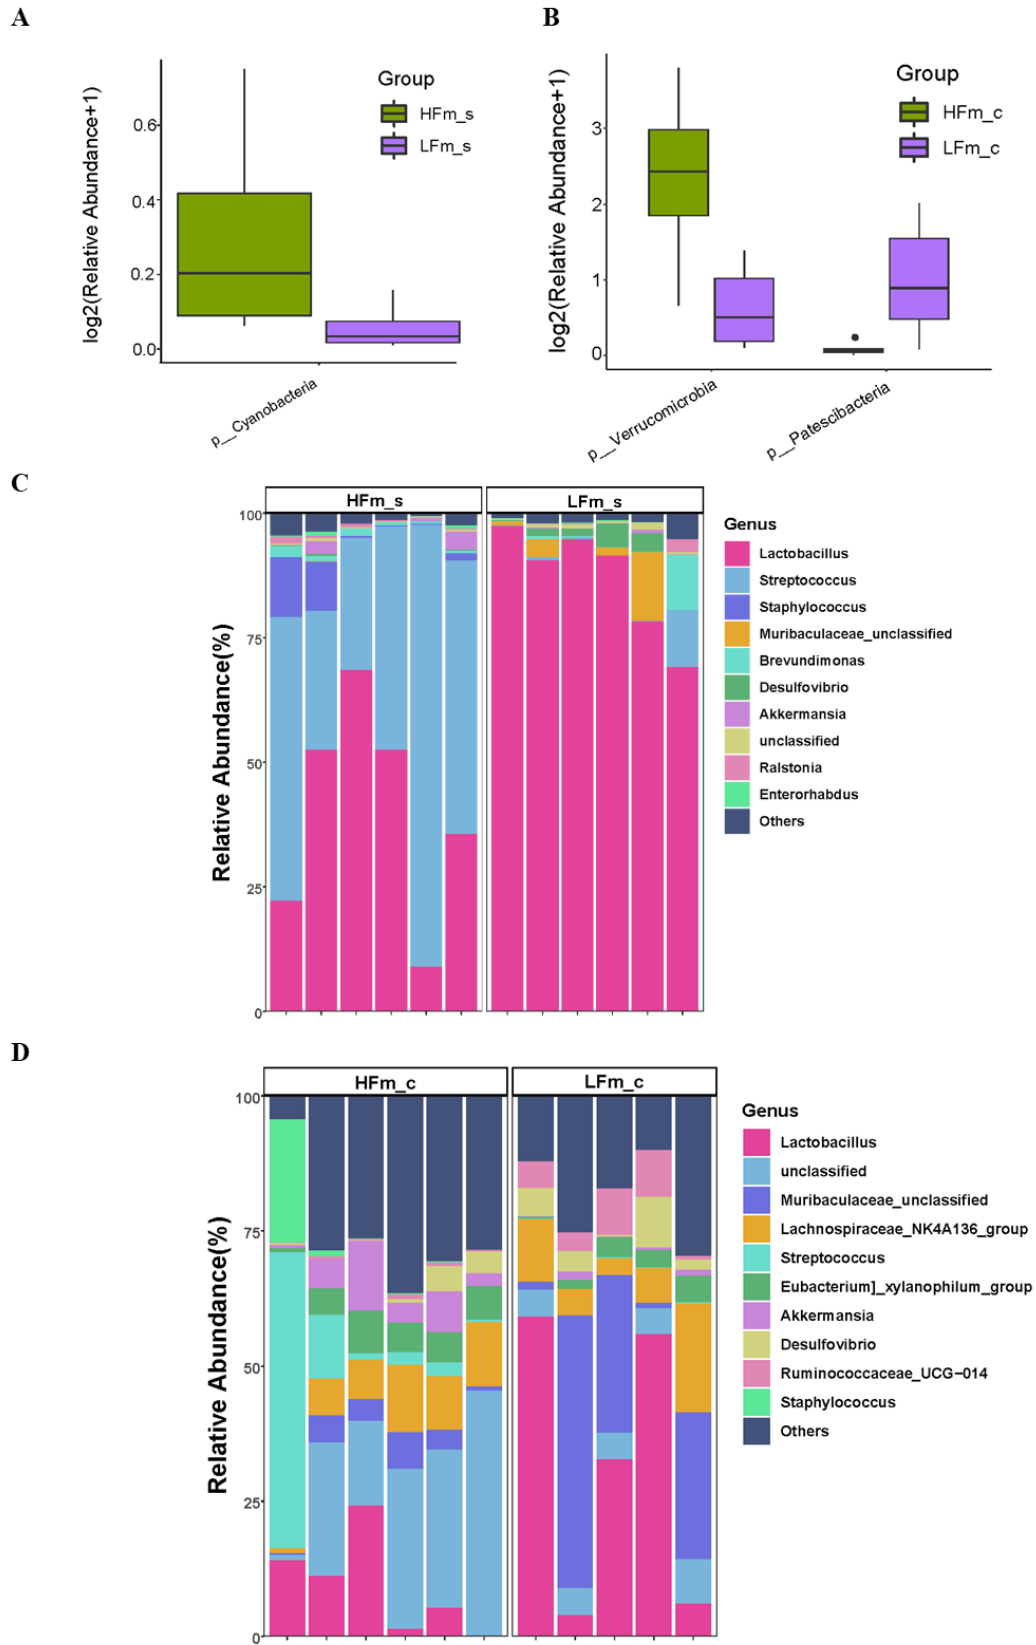

**FIG S3. Effect of high- and low-fibre diets on the intestinal microbiota of mice.**

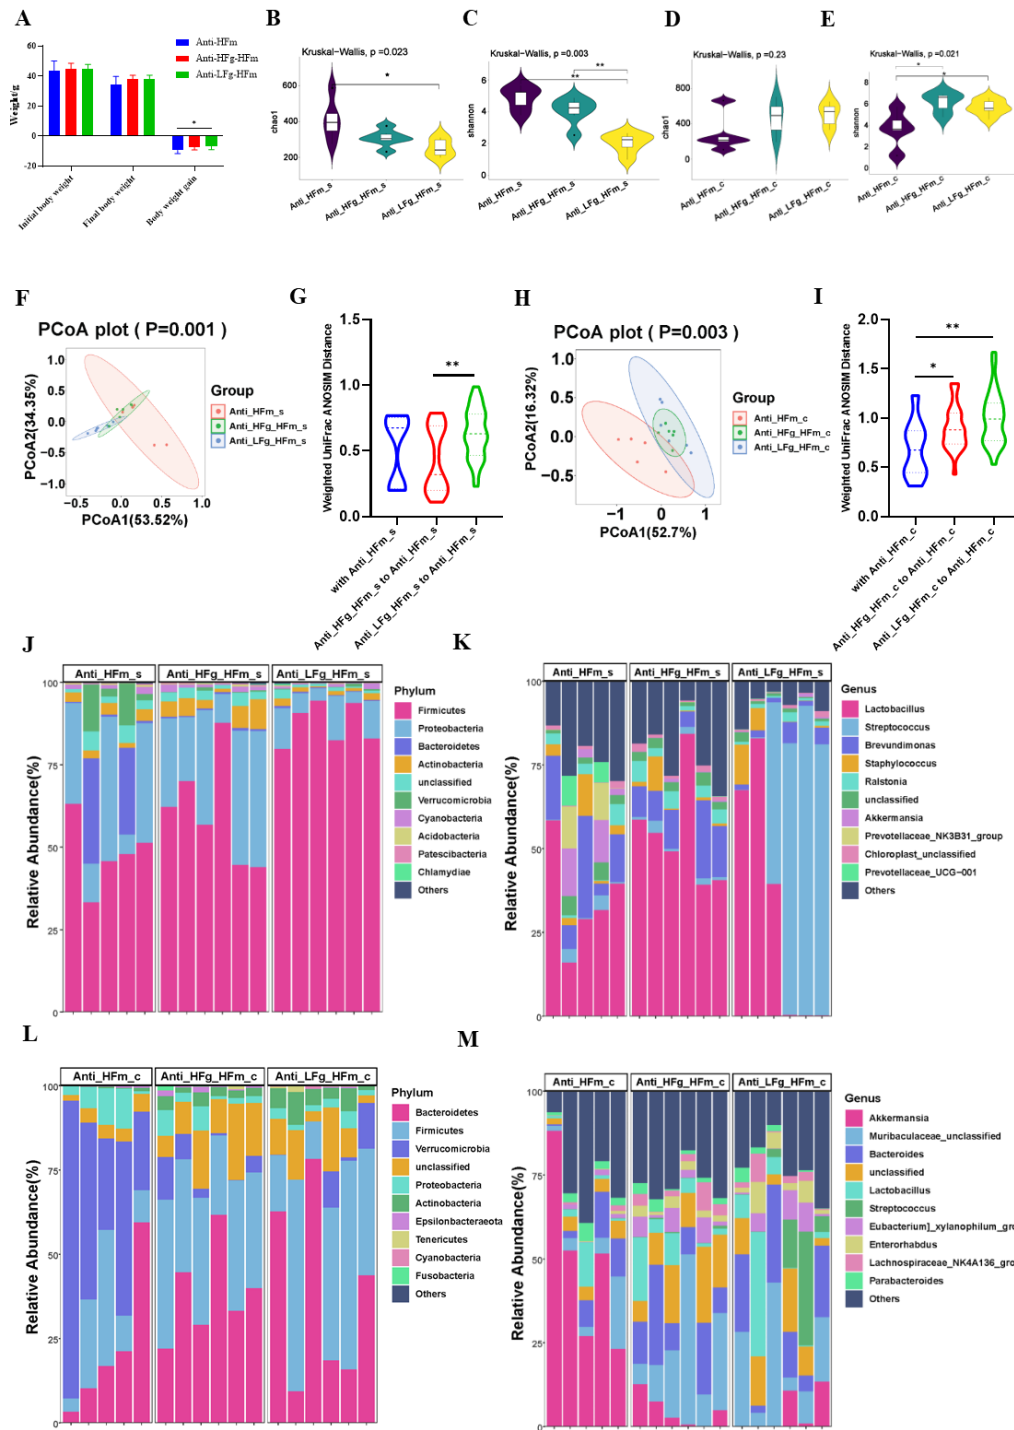

**FIG S4. Effects of ruminal microbiota transplant on the significantly changed growth performance and intestinal microbial composition of antibiotics pre-treated mice that fed with high fibre diet when compared with the antibiotics pre-treated mice fed with high fibre diet but without RMT treatment.**

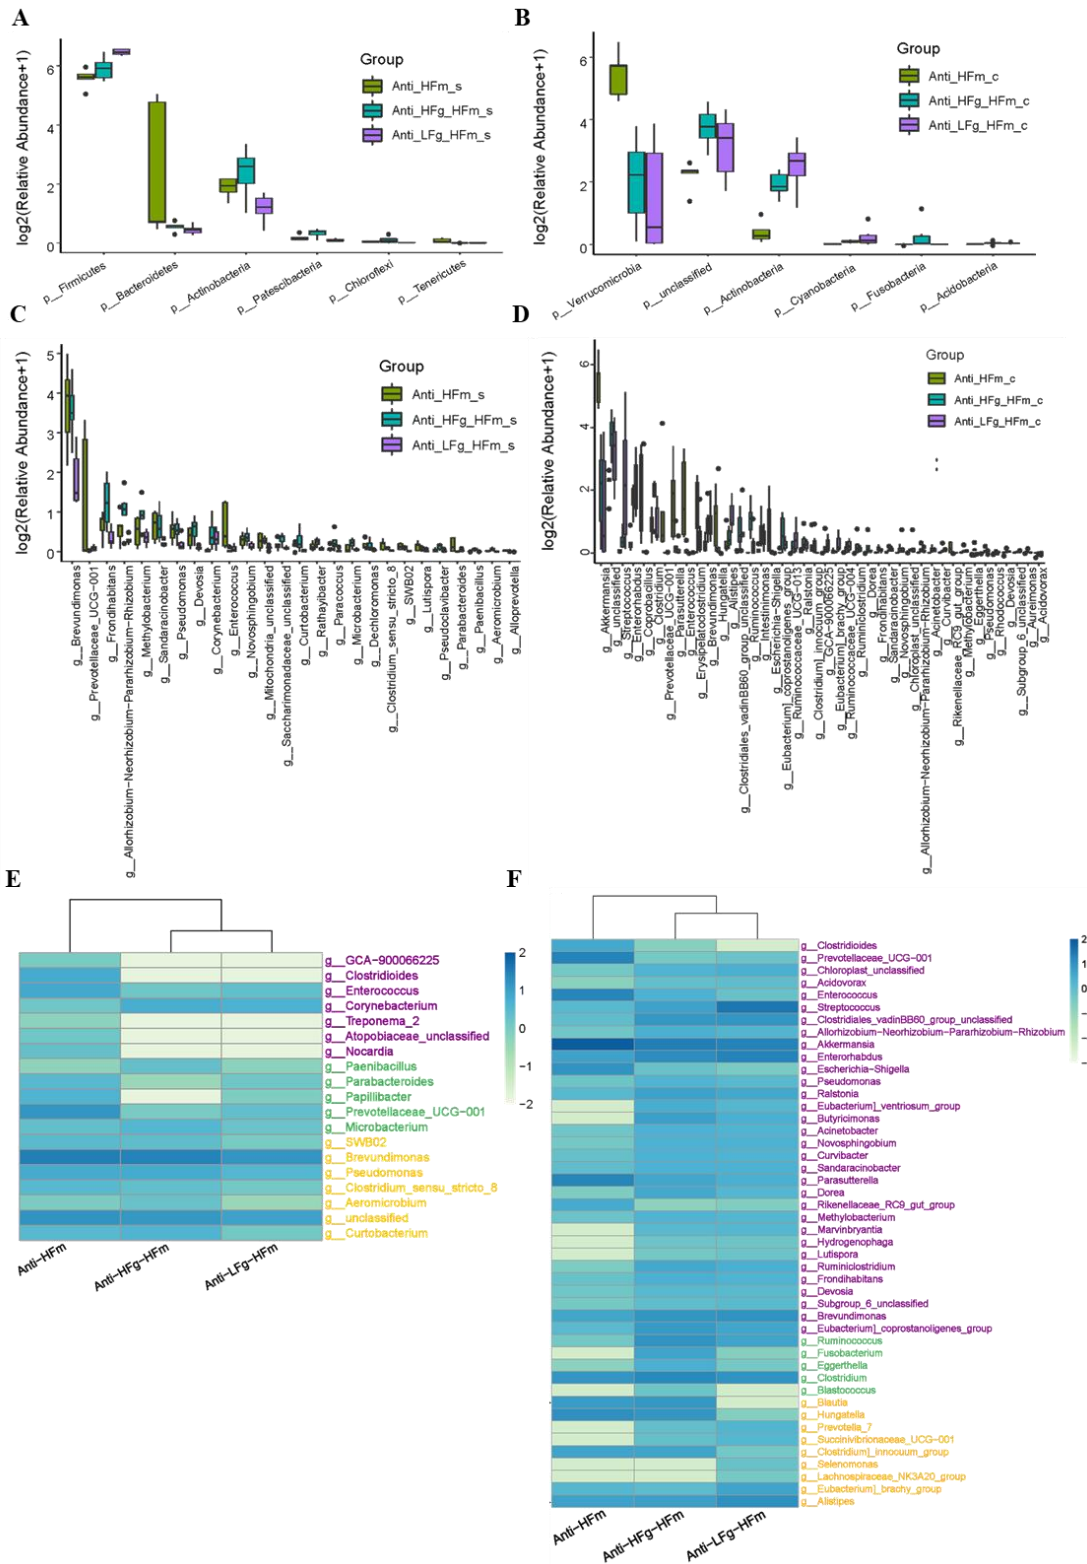

**FIG S5.** Significantly changed bacteria between antibiotic-treated mice receiving RMT treatment when compared with the antibiotic-treated mice without RMY when they all received a high fibre diet.

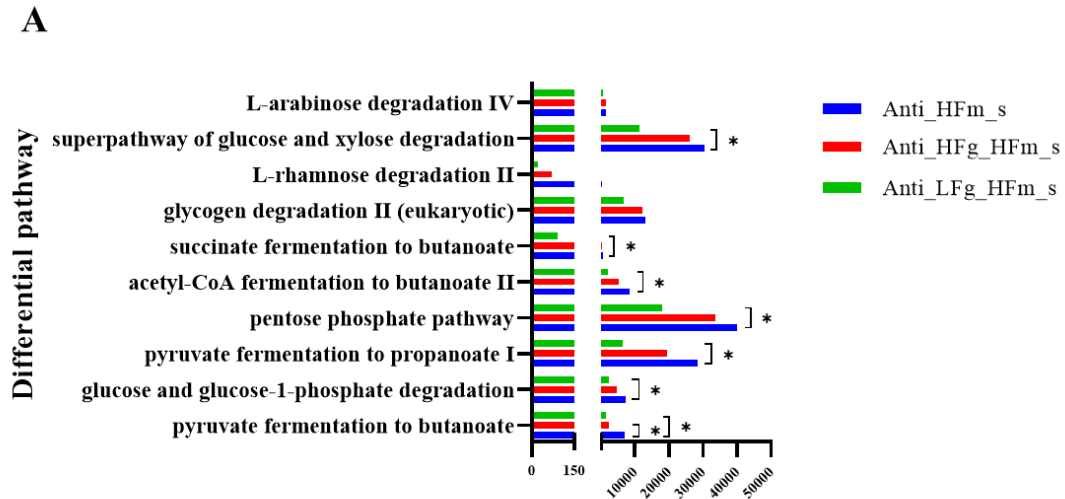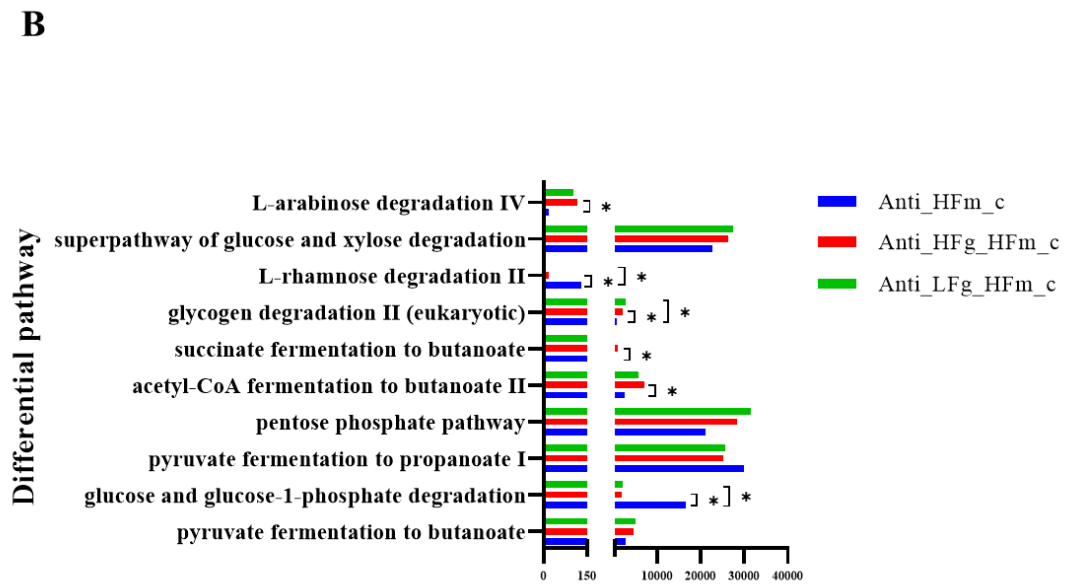

**FIG S6. Function prediction of intestinal and colonic microbiota among Anti\_HFm group, the Anti\_HFg\_HFm group, and Anti\_LFg\_HFm group.**

**Table S1 Differential bacteria at the phylum level in the comparison group appearing in this paper**

| Differential bacteria at the<br>phylum level | Relative abundance Differential bacteria |             | <i>P</i><br>value |
|----------------------------------------------|------------------------------------------|-------------|-------------------|
|                                              | mean_Dairy goat                          | mean_Mice_s |                   |
| p__Kiritimatiellaeota                        | 1.47                                     | 0.00        | 0.00              |
| p__Tenericutes                               | 1.19                                     | 0.00        | 0.00              |
| p__Planctomycetes                            | 0.06                                     | 0.00        | 0.00              |
| p__Firmicutes                                | 26.46                                    | 90.26       | 0.00              |
| p__Bacteroidetes                             | 60.34                                    | 3.36        | 0.00              |
| p__unclassified                              | 3.87                                     | 0.67        | 0.00              |
| p__Patescibacteria                           | 1.30                                     | 0.13        | 0.00              |
| p__Cyanobacteria                             | 1.35                                     | 0.03        | 0.00              |
| p__Chloroflexi                               | 0.03                                     | 0.00        | 0.01              |
| p__Acidobacteria                             | 0.00                                     | 0.06        | 0.05              |
| p__Epsilonbacteraeota                        | 0.00                                     | 0.01        | 0.05              |
|                                              | mean_Dairy goat                          | mean_Mice_c |                   |
| p__Epsilonbacteraeota                        | 0.00                                     | 0.82        | 0.00              |
| p__Kiritimatiellaeota                        | 1.47                                     | 0.00        | 0.01              |
| p__Cyanobacteria                             | 1.35                                     | 0.03        | 0.01              |
| p__Tenericutes                               | 1.19                                     | 0.21        | 0.01              |
| p__Actinobacteria                            | 0.14                                     | 1.44        | 0.01              |
| p__Verrucomicrobia                           | 0.06                                     | 0.66        | 0.02              |
| p__Bacteria_unclassified                     | 0.01                                     | 0.00        | 0.02              |
| p__Bacteroidetes                             | 60.34                                    | 28.17       | 0.04              |
| p__Firmicutes                                | 26.46                                    | 57.35       | 0.04              |
| p__unclassified                              | 3.87                                     | 5.62        | 0.04              |
|                                              | mean_HFg                                 | mean_LFg    |                   |

|                      |            |                     |                     |      |
|----------------------|------------|---------------------|---------------------|------|
| p__Bacteroidetes     | 60.34      | 18.50               |                     | 0.00 |
| p__Cyanobacteria     | 1.35       | 0.36                |                     | 0.00 |
| p__Actinobacteria    | 0.14       | 0.75                |                     | 0.00 |
| p__Spirochaetes      | 0.49       | 0.13                |                     | 0.00 |
| p__Planctomycetes    | 0.06       | 0.24                |                     | 0.00 |
| p__unclassified      | 3.87       | 8.24                |                     | 0.01 |
| p__Patescibacteria   | 1.30       | 4.42                |                     | 0.01 |
| p__Lentisphaerae     | 0.23       | 0.07                |                     | 0.01 |
| p__Kiritimatiellaota | 1.47       | 0.89                |                     | 0.01 |
| p__Firmicutes        | 26.46      | 52.05               |                     | 0.04 |
| p__Chloroflexi       | 0.03       | 0.11                |                     | 0.04 |
|                      | mean_HFm_s | mean_LFm_s          |                     |      |
| p__Cyanobacteria     | 0.23       | 0.03                |                     | 0.04 |
|                      | mean_HFm_c | mean_LFm_c          |                     |      |
| p__Verrucomicrobia   | 5.38       | 0.66                |                     | 0.02 |
| p__Patescibacteria   | 0.07       | 1.26                |                     | 0.03 |
|                      | mean_HFm_s | mean_Anti_HFg_HFm_s | mean_Anti_LFg_HFm_s |      |
| p__Proteobacteria    | 2.58       | 28.66               | 8.35                | 0.00 |
| p__Firmicutes        | 94.65      | 60.93               | 87.41               | 0.00 |
| p__Acidobacteria     | 0.02       | 0.26                | 0.14                | 0.01 |
| p__Patescibacteria   | 0.03       | 0.26                | 0.07                | 0.01 |
| p__Bacteroidetes     | 0.15       | 0.49                | 0.37                | 0.01 |
| p__Cyanobacteria     | 0.23       | 1.23                | 0.69                | 0.01 |
| p__Actinobacteria    | 0.81       | 4.93                | 1.36                | 0.02 |
| p__Chloroflexi       | 0.00       | 0.09                | 0.01                | 0.02 |
| p__Planctomycetes    | 0.00       | 0.05                | 0.04                | 0.02 |

|                       |                 |                     |                     |       |
|-----------------------|-----------------|---------------------|---------------------|-------|
| p__Spirochaetes       | 0.00            | 0                   | 0                   | 0.03  |
|                       | mean_HFm_c      | mean_Anti_HFg_HFm_c | mean_Anti_LFg_HFm_c |       |
| p__Fusobacteria       | 0.00            | 0.27                | 0.00                | 0.00  |
| p__Actinobacteria     | 0.90            | 2.89                | 5.32                | 0.00  |
| p__Patescibacteria    | 0.07            | 0.01                | 0.01                | 0.01  |
| p__Acidobacteria      | 0.01            | 0.03                | 0.03                | 0.01  |
| p__Epsilonbacteraeota | 0.20            | 0.76                | 0.15                | 0.02  |
| p__Bacteroidetes      | 13.71           | 38.48               | 38.13               | 0.03  |
|                       | mean_LFm_s      | mean_Anti_HFg_LFm_s | mean_Anti_LFg_LFm_s |       |
| p__Patescibacteria    | 0.13            | 0.00                | 0.00                | 0.01  |
|                       | mean_LFm_c      | mean_Anti_HFg_LFm_c | mean_Anti_LFg_LFm_c |       |
| p__Epsilonbacteraeota | 0.82            | 4.94                | 0.05                | 0.01  |
| p__Tenericutes        | 0.21            | 0.01                | 0.03                | 0.03  |
| p__Acidobacteria      | 0.00            | 0.03                | 0.02                | 0.03  |
|                       | mean_Anti_HFm_s | mean_Anti_HFg_HFm_s | mean_Anti_LFg_HFm_s |       |
| p__Firmicutes         | 0.01            | 48.36               | 60.93               | 87.41 |
| p__Tenericutes        | 0.02            | 0.06                | 0.01                | 0.01  |
| p__Actinobacteria     | 0.02            | 2.75                | 4.93                | 1.36  |
| p__Patescibacteria    | 0.04            | 0.15                | 0.26                | 0.07  |
| p__Chloroflexi        | 0.05            | 0.03                | 0.09                | 0.01  |
| p__Bacteroidetes      | 0.05            | 11.99               | 0.49                | 0.37  |
|                       | mean_Anti_HFm_c | mean_Anti_HFg_HFm_c | mean_Anti_LFg_HFm_c |       |
| p__Fusobacteria       | 0.00            | 0.27                | 0.00                | 0.00  |
| p__Actinobacteria     | 0.36            | 2.89                | 5.32                | 0.00  |
| p__Verrucomicrobia    | 48.56           | 4.76                | 4.24                | 0.01  |
| p__Cyanobacteria      | 0.01            | 0.07                | 0.22                | 0.02  |

|                  |      |       |      |      |
|------------------|------|-------|------|------|
| p__Acidobacteria | 0.00 | 0.03  | 0.03 | 0.02 |
| p__unclassified  | 3.83 | 13.60 | 9.72 | 0.04 |

---



**Table S2 Differential bacteria at the genus level in the comparison group appearing in this paper**

| Differential bacteria at the genus level | Relative abundance Differential bacteria |             | <i>P</i><br>value |
|------------------------------------------|------------------------------------------|-------------|-------------------|
|                                          | mean_Dairy goat                          | mean_Mice_s |                   |
| g__Prevotella_1                          | 25.16                                    | 0.00        | 0.00              |
| g__Bacteroidales_RF16_group_unclassified | 4.05                                     | 0.00        | 0.00              |
| g__Prevotellaceae_UCG-003                | 3.23                                     | 0.00        | 0.00              |
| g__Erysipelotrichaceae_UCG-004           | 2.76                                     | 0.00        | 0.00              |
| g__WCHB1-41_unclassified                 | 1.47                                     | 0.00        | 0.00              |
| g__Ruminococcus_1                        | 0.89                                     | 0.00        | 0.00              |
| g__Eubacterium]_coprostanoligenes_group  | 0.72                                     | 0.00        | 0.00              |
| g__Anaeroplasma                          | 0.66                                     | 0.00        | 0.00              |
| g__Pseudobutyrvibrio                     | 0.33                                     | 0.00        | 0.00              |
| g__Ruminococcaceae_UCG-005               | 0.19                                     | 0.00        | 0.00              |
| g__Christensenellaceae_unclassified      | 0.13                                     | 0.00        | 0.00              |
| g__Papillibacter                         | 0.11                                     | 0.00        | 0.00              |
| g__Tyzzerella_3                          | 0.05                                     | 0.00        | 0.00              |
| g__Stenotrophomonas                      | 0.03                                     | 0.00        | 0.00              |
| g__Rikenellaceae_RC9_gut_group           | 10.97                                    | 0.00        | 0.00              |
| g__Prevotellaceae_UCG-001                | 3.29                                     | 0.00        | 0.00              |
| g__Ruminococcus_2                        | 2.05                                     | 0.00        | 0.00              |
| g__Lachnospiraceae_XPB1014_group         | 0.99                                     | 0.00        | 0.00              |
| g__Ralstonia                             | 0.00                                     | 0.48        | 0.00              |
| g__Mollicutes_RF39_unclassified          | 0.44                                     | 0.00        | 0.00              |
| g__Anaerobiospirillum                    | 0.37                                     | 0.00        | 0.00              |
| g__Ruminiclostridium_6                   | 0.08                                     | 0.00        | 0.00              |
| g__Streptococcus                         | 0.01                                     | 2.08        | 0.00              |

|                                          |                 |             |      |
|------------------------------------------|-----------------|-------------|------|
| g__Ruminococcaceae_UCG-013               | 0.20            | 0.01        | 0.00 |
| g__Lactobacillus                         | 0.15            | 87.00       | 0.00 |
| g__F082_unclassified                     | 7.20            | 0.01        | 0.00 |
| g__unclassified                          | 3.87            | 0.67        | 0.00 |
| g__Christensenellaceae_R-7_group         | 4.21            | 0.01        | 0.00 |
| g__Ruminococcaceae_UCG-014               | 1.39            | 0.18        | 0.00 |
| g__Gastranaerophilales_unclassified      | 1.31            | 0.01        | 0.00 |
| g__Candidatus_Saccharimonas              | 1.02            | 0.13        | 0.00 |
| g__Erysipelotrichaceae_unclassified      | 0.28            | 0.01        | 0.00 |
| g__Family_XIII_AD3011_group              | 0.03            | 0.00        | 0.00 |
| g__Enterorhabdus                         | 0.00            | 0.14        | 0.01 |
| g__Prevotellaceae_NK3B31_group           | 0.03            | 0.00        | 0.01 |
| g__Dorea                                 | 0.00            | 0.07        | 0.01 |
| g__Lachnospiraceae_NK4A136_group         | 0.01            | 0.23        | 0.01 |
| g__Clostridiales_unclassified            | 0.23            | 0.05        | 0.02 |
| g__Peptococcaceae_unclassified           | 0.02            | 0.00        | 0.02 |
| g__Clostridium                           | 0.08            | 0.03        | 0.04 |
| g__Bacteroides                           | 0.02            | 0.00        | 0.05 |
| g__Ruminococcus                          | 0.02            | 0.00        | 0.05 |
| g__Subgroup_6_unclassified               | 0.00            | 0.04        | 0.05 |
| g__Pseudomonas                           | 0.00            | 0.04        | 0.05 |
|                                          | mean_Dairy goat | mean_Mice_c |      |
| g__Prevotella_1                          | 25.16           | 0.00        | 0.01 |
| g__Bacteroidales_RF16_group_unclassified | 4.05            | 0.00        | 0.01 |
| g__Erysipelotrichaceae_UCG-004           | 2.76            | 0.00        | 0.01 |
| g__Prevotella                            | 2.53            | 0.00        | 0.01 |

|                                              |       |       |      |
|----------------------------------------------|-------|-------|------|
| g__WCHB1-41_unclassified                     | 1.47  | 0.00  | 0.01 |
| g__Enterorhabdus                             | 0.00  | 1.42  | 0.01 |
| g__Bacteroidales_BS11_gut_group_unclassified | 1.14  | 0.00  | 0.01 |
| g__Pseudobutyrvibrio                         | 0.33  | 0.00  | 0.01 |
| g__Dorea                                     | 0.00  | 0.28  | 0.01 |
| g__Shuttleworthia                            | 0.05  | 0.00  | 0.01 |
| g__Defluviitaleaceae_UCG-011                 | 0.05  | 0.00  | 0.01 |
| g__Chloroplast_unclassified                  | 0.04  | 0.00  | 0.01 |
| g__Eubacterium]_brachy_group                 | 0.00  | 0.03  | 0.01 |
| g__Lachnospiraceae_NK4A136_group             | 0.01  | 9.23  | 0.01 |
| g__F082_unclassified                         | 7.20  | 0.00  | 0.01 |
| g__Rikenellaceae_RC9_gut_group               | 10.97 | 0.02  | 0.01 |
| g__Anaerovorax                               | 0.11  | 0.01  | 0.01 |
| g__Lactobacillus                             | 0.15  | 31.63 | 0.01 |
| g__Christensenellaceae_R-7_group             | 4.21  | 0.07  | 0.01 |
| g__Desulfovibrio                             | 0.21  | 4.11  | 0.01 |
| g__Prevotellaceae_UCG-001                    | 3.29  | 0.10  | 0.01 |
| g__Eubacterium]_xylanophilum_group           | 0.09  | 2.76  | 0.01 |
| g__Gastranaerophilales_unclassified          | 1.31  | 0.03  | 0.01 |
| g__Ruminococcus_1                            | 0.89  | 0.12  | 0.01 |
| g__Eubacterium]_coprostanoligenes_group      | 0.72  | 0.04  | 0.01 |
| g__Ruminococcaceae_UCG-010                   | 0.64  | 0.04  | 0.01 |
| g__Akkermansia                               | 0.03  | 0.66  | 0.01 |
| g__Ruminiclostridium_5                       | 0.01  | 0.33  | 0.01 |
| g__Ruminococcaceae_UCG-005                   | 0.19  | 0.04  | 0.01 |
| g__Ruminococcaceae_unclassified              | 0.13  | 0.02  | 0.01 |

|                                               |          |          |      |
|-----------------------------------------------|----------|----------|------|
| g__Family_XIII_AD3011_group                   | 0.03     | 0.11     | 0.01 |
| g__Alloprevotella                             | 0.00     | 0.47     | 0.01 |
| g__Anaeroplasma                               | 0.66     | 0.07     | 0.01 |
| g__Streptococcus                              | 0.01     | 0.14     | 0.01 |
| g__Lachnospira                                | 0.06     | 0.01     | 0.01 |
| g__Tyzzerella_3                               | 0.05     | 0.01     | 0.01 |
| g__Christensenellaceae_unclassified           | 0.13     | 0.02     | 0.01 |
| g__Acetobacter                                | 0.80     | 0.00     | 0.02 |
| g__Prevotellaceae_NK3B31_group                | 0.03     | 0.00     | 0.02 |
| g__Bacteroides                                | 0.02     | 1.55     | 0.02 |
| g__Clostridium                                | 0.08     | 0.58     | 0.02 |
| g__Bacteria_unclassified                      | 0.01     | 0.00     | 0.02 |
| g__Clostridiales_vadinBB60_group_unclassified | 0.32     | 0.12     | 0.03 |
| g__Acinetobacter                              | 0.14     | 0.00     | 0.04 |
| g__Ralstonia                                  | 0.00     | 0.03     | 0.04 |
| g__Muribaculaceae_unclassified                | 0.96     | 21.80    | 0.04 |
| g__unclassified                               | 3.87     | 5.62     | 0.04 |
| g__Mollicutes_RF39_unclassified               | 0.44     | 0.15     | 0.04 |
| g__Ruminococcaceae_UCG-013                    | 0.20     | 0.09     | 0.04 |
| g__Lachnospiraceae_unclassified               | 0.01     | 0.18     | 0.05 |
| g__GCA-900066225                              | 0.00     | 0.05     | 0.05 |
|                                               | mean_HFg | mean_LFg |      |
| g__Solobacterium                              | 0.00     | 0.08     | 0.00 |
| g__Pedosphaeraceae_unclassified               | 0.02     | 0.00     | 0.00 |
| g__Prevotella_1                               | 25.16    | 4.05     | 0.00 |
| g__Ruminococcus_2                             | 2.05     | 14.13    | 0.00 |

|                                               |      |      |      |
|-----------------------------------------------|------|------|------|
| g__Candidatus_Saccharimonas                   | 1.02 | 4.33 | 0.00 |
| g__Bacteroidales_RF16_group_unclassified      | 4.05 | 0.14 | 0.00 |
| g__Prevotellaceae_UCG-003                     | 3.23 | 0.53 | 0.00 |
| g__Prevotella                                 | 2.53 | 0.26 | 0.00 |
| g__Gastranaerophilales_unclassified           | 1.31 | 0.31 | 0.00 |
| g__Bacteroidales_unclassified                 | 0.91 | 0.21 | 0.00 |
| g__Anaeroplasma                               | 0.66 | 0.01 | 0.00 |
| g__Treponema_2                                | 0.39 | 0.11 | 0.00 |
| g__Clostridiales_vadinBB60_group_unclassified | 0.32 | 0.07 | 0.00 |
| g__Eubacterium]_ventriosum_group              | 0.05 | 0.26 | 0.00 |
| g__Eubacterium]_nodatum_group                 | 0.02 | 0.12 | 0.00 |
| g__DNF00809                                   | 0.02 | 0.10 | 0.00 |
| g__CPla-4_termite_group                       | 0.01 | 0.05 | 0.00 |
| g__Sediminispirochaeta                        | 0.03 | 0.01 | 0.00 |
| g__Anaerofustis                               | 0.00 | 0.03 | 0.00 |
| g__Tyzzerella_3                               | 0.05 | 0.00 | 0.01 |
| g__Prevotellaceae_UCG-004                     | 0.04 | 0.01 | 0.01 |
| g__Succinivibrionaceae_UCG-002                | 0.23 | 0.02 | 0.01 |
| g__Victivallis                                | 0.05 | 0.01 | 0.01 |
| g__unclassified                               | 3.87 | 8.24 | 0.01 |
| g__Prevotellaceae_UCG-001                     | 3.29 | 0.35 | 0.01 |
| g__Eubacterium]_coprostanoligenes_group       | 0.72 | 2.19 | 0.01 |
| g__Clostridiales_unclassified                 | 0.23 | 0.75 | 0.01 |
| g__p-1088-a5_gut_group                        | 0.04 | 0.19 | 0.01 |
| g__Dorea                                      | 0.00 | 0.08 | 0.01 |
| g__Pseudoramibacter                           | 0.01 | 0.00 | 0.01 |

|                                              |       |      |      |
|----------------------------------------------|-------|------|------|
| g__Lachnospira                               | 0.06  | 0.01 | 0.01 |
| g__Rikenellaceae_RC9_gut_group               | 10.97 | 5.21 | 0.01 |
| g__Lachnospiraceae_XPB1014_group             | 0.99  | 3.15 | 0.01 |
| g__WCHB1-41_unclassified                     | 1.47  | 0.89 | 0.01 |
| g__Erysipelotrichaceae_unclassified          | 0.28  | 0.81 | 0.01 |
| g__Absconditabacteriales_(SR1)_unclassified  | 0.27  | 0.07 | 0.01 |
| g__Ruminococcaceae_UCG-004                   | 0.04  | 0.14 | 0.01 |
| g__Eubacterium]_cellulosolvens_group         | 0.00  | 0.04 | 0.01 |
| g__Izimaplasmatales_unclassified             | 0.02  | 0.00 | 0.01 |
| g__Howardella                                | 0.01  | 0.07 | 0.02 |
| g__Sphaerochaeta                             | 0.05  | 0.01 | 0.02 |
| g__F082_unclassified                         | 7.20  | 3.34 | 0.02 |
| g__Erysipelotrichaceae_UCG-004               | 2.76  | 0.58 | 0.02 |
| g__Bacteroidales_BS11_gut_group_unclassified | 1.14  | 0.19 | 0.02 |
| g__Desulfovibrio                             | 0.21  | 0.55 | 0.02 |
| g__vadinBE97_unclassified                    | 0.17  | 0.07 | 0.02 |
| g__Olsenella                                 | 0.02  | 0.10 | 0.02 |
| g__U29-B03                                   | 0.06  | 0.01 | 0.02 |
| g__Blautia                                   | 0.00  | 0.05 | 0.02 |
| g__Sporobacter                               | 0.00  | 0.01 | 0.02 |
| g__Ruminobacter                              | 0.04  | 0.01 | 0.02 |
| g__Lachnospiraceae_NK3A20_group              | 0.38  | 1.54 | 0.03 |
| g__Family_XIII_AD3011_group                  | 0.03  | 0.12 | 0.03 |
| g__FD2005                                    | 0.00  | 0.62 | 0.03 |
| g__GCA-900066225                             | 0.00  | 0.03 | 0.03 |
| g__Succinivibrio                             | 0.00  | 0.07 | 0.03 |

|                                                       |            |            |      |
|-------------------------------------------------------|------------|------------|------|
| g__Desulfobulbus                                      | 0.00       | 0.01       | 0.03 |
| g__Family_XIII_UCG-001                                | 0.01       | 0.07       | 0.04 |
| g__p-251-o5_unclassified                              | 0.47       | 0.03       | 0.04 |
| g__Acetitomaculum                                     | 0.11       | 0.57       | 0.04 |
| g__Flexilinea                                         | 0.03       | 0.11       | 0.04 |
| g__Lachnobacterium                                    | 0.01       | 0.12       | 0.04 |
| g__Ruminococcaceae_UCG-011                            | 0.00       | 0.03       | 0.04 |
| g__Atopobiaceae_unclassified                          | 0.00       | 0.01       | 0.04 |
| g__Eggerthellaceae_unclassified                       | 0.01       | 0.05       | 0.05 |
| g__Stenotrophomonas                                   | 0.03       | 0.01       | 0.05 |
| g__Allorhizobium-Neorhizobium-Pararhizobium-Rhizobium | 0.01       | 0.00       | 0.05 |
| g__gut                                                | 0.01       | 0.00       | 0.05 |
| g__EMP-G18_unclassified                               | 0.01       | 0.00       | 0.05 |
| g__M2PT2-76_termite_group                             | 0.01       | 0.00       | 0.05 |
| g__Denitrobacterium                                   | 0.00       | 0.01       | 0.05 |
|                                                       | mean_HFm_s | mean_LFm_s |      |
| g__Corynebacterium                                    | 0.17       | 0.00       | 0.00 |
| g__Lactobacillus                                      | 40.14      | 87.00      | 0.00 |
| g__Streptococcus                                      | 49.94      | 2.08       | 0.00 |
| g__Prevotellaceae_UCG-001                             | 0.02       | 0.00       | 0.01 |
| g__Curvibacter                                        | 0.08       | 0.01       | 0.01 |
| g__Intestinimonas                                     | 0.00       | 0.01       | 0.01 |
| g__Methylobacterium                                   | 0.09       | 0.01       | 0.01 |
| g__Chloroplast_unclassified                           | 0.23       | 0.02       | 0.02 |
| g__Allorhizobium-Neorhizobium-Pararhizobium-Rhizobium | 0.05       | 0.00       | 0.02 |
| g__Erysipelotrichaceae_unclassified                   | 0.00       | 0.01       | 0.02 |

|                                         |            |            |      |
|-----------------------------------------|------------|------------|------|
| g__Sphingomonas                         | 0.05       | 0.01       | 0.02 |
| g__Bacteroides                          | 0.03       | 0.00       | 0.02 |
| g__Muribaculaceae_unclassified          | 0.05       | 3.31       | 0.03 |
| g__Dorea                                | 0.02       | 0.07       | 0.03 |
| g__Ruminococcaceae_UCG-014              | 0.03       | 0.18       | 0.03 |
| g__Staphylococcaceae_unclassified       | 0.05       | 0.01       | 0.03 |
| g__Ruminococcus_1                       | 0.01       | 0.00       | 0.03 |
| g__Clostridium_sensu_stricto_8          | 0.01       | 0.01       | 0.05 |
| g__Bradyrhizobium                       | 0.02       | 0.01       | 0.05 |
|                                         | mean_HFm_c | mean_LFm_c |      |
| g__Sandaracinobacter                    | 0.02       | 0.01       | 0.01 |
| g__Streptococcus                        | 12.17      | 0.14       | 0.01 |
| g__Family_XIII_AD3011_group             | 0.01       | 0.11       | 0.01 |
| g__Erysipelatoclostridium               | 0.02       | 0.07       | 0.01 |
| g__Prevotellaceae_NK3B31_group          | 2.91       | 0.00       | 0.01 |
| g__Ruminococcaceae_UCG-014              | 0.48       | 5.29       | 0.01 |
| g__Erysipelotrichaceae_unclassified     | 0.07       | 0.29       | 0.01 |
| g__Rikenella                            | 0.02       | 0.40       | 0.02 |
| g__Akkermansia                          | 5.38       | 0.66       | 0.02 |
| g__Prevotellaceae_UCG-001               | 3.91       | 0.10       | 0.02 |
| g__Eubacterium]_coprostanoligenes_group | 0.54       | 0.04       | 0.02 |
| g__Atopobiaceae_unclassified            | 0.03       | 0.00       | 0.02 |
| g__Corynebacterium                      | 0.01       | 0.00       | 0.02 |
| g__Ruminococcus                         | 1.27       | 0.04       | 0.03 |
| g__Candidatus_Saccharimonas             | 0.06       | 1.26       | 0.03 |
| g__Lachnospiraceae_NC2004_group         | 0.02       | 0.00       | 0.03 |



|                                                       |            |                     |                     |      |
|-------------------------------------------------------|------------|---------------------|---------------------|------|
| g__Lachnospiraceae_UCG-001                            | 0.10       | 0.01                |                     | 0.04 |
|                                                       | mean_HFm_s | mean_Anti_HFg_HFm_s | mean_Anti_LFg_HFm_s |      |
| g__Rathayibacter                                      | 0.01       | 0.18                | 0.05                | 0.00 |
| g__Sandaracinobacter                                  | 0.07       | 0.63                | 0.15                | 0.00 |
| g__Allorhizobium-Neorhizobium-Pararhizobium-Rhizobium | 0.05       | 1.16                | 0.23                | 0.00 |
| g__Mitochondria_unclassified                          | 0.03       | 0.21                | 0.07                | 0.00 |
| g__Microbacterium                                     | 0.00       | 0.16                | 0.03                | 0.00 |
| g__Methylobacterium                                   | 0.09       | 0.97                | 0.28                | 0.00 |
| g__Methyloversatilis                                  | 0.03       | 0.32                | 0.12                | 0.00 |
| g__Saccharimonadaceae_unclassified                    | 0.02       | 0.25                | 0.06                | 0.00 |
| g__Devosia                                            | 0.02       | 0.50                | 0.07                | 0.00 |
| g__unclassified                                       | 0.30       | 2.67                | 1.10                | 0.00 |
| g__Novosphingobium                                    | 0.03       | 0.29                | 0.10                | 0.00 |
| g__Fronidihabitans                                    | 0.07       | 1.54                | 0.28                | 0.00 |
| g__Mycobacterium                                      | 0.01       | 0.14                | 0.06                | 0.00 |
| g__Clostridium_sensu_stricto_8                        | 0.01       | 0.06                | 0.02                | 0.00 |
| g__Brevundimonas                                      | 1.04       | 12.13               | 2.96                | 0.00 |
| g__Ralstonia                                          | 0.49       | 3.81                | 1.27                | 0.00 |
| g__Schumannella                                       | 0.03       | 0.48                | 0.13                | 0.00 |
| g__Sphingomonas                                       | 0.05       | 1.01                | 0.21                | 0.00 |
| g__Pseudomonas                                        | 0.04       | 0.47                | 0.16                | 0.00 |
| g__Sediminibacterium                                  | 0.00       | 0.08                | 0.05                | 0.00 |
| g__Sphingobium                                        | 0.03       | 0.39                | 0.15                | 0.00 |
| g__SWB02                                              | 0.00       | 0.06                | 0.01                | 0.00 |
| g__Aureimonas                                         | 0.02       | 0.26                | 0.07                | 0.00 |
| g__Aeromicrobium                                      | 0.00       | 0.04                | 0.00                | 0.00 |

|                                  |      |      |      |      |
|----------------------------------|------|------|------|------|
| g__Caulobacter                   | 0.04 | 0.34 | 0.41 | 0.00 |
| g__Hydrogenophaga                | 0.01 | 0.11 | 0.08 | 0.00 |
| g__Acinetobacter                 | 0.04 | 0.91 | 0.43 | 0.00 |
| g__Subgroup_6_unclassified       | 0.02 | 0.17 | 0.10 | 0.00 |
| g__Patulibacter                  | 0.00 | 0.07 | 0.02 | 0.01 |
| g__Curvibacter                   | 0.08 | 1.00 | 0.43 | 0.01 |
| g__Pseudoclavibacter             | 0.00 | 0.10 | 0.01 | 0.01 |
| g__Herbaspirillum                | 0.01 | 0.17 | 0.03 | 0.01 |
| g__Rhodococcus                   | 0.03 | 0.67 | 0.18 | 0.01 |
| g__Paracoccus                    | 0.01 | 0.20 | 0.02 | 0.01 |
| g__Salana                        | 0.01 | 0.22 | 0.04 | 0.01 |
| g__Dechloromonas                 | 0.01 | 0.11 | 0.02 | 0.01 |
| g__Kineococcus                   | 0.01 | 0.07 | 0.03 | 0.01 |
| g__Paenibacillus                 | 0.00 | 0.04 | 0.00 | 0.01 |
| g__Pantoea                       | 0.02 | 0.38 | 0.14 | 0.01 |
| g__Bacillus                      | 0.00 | 0.06 | 0.01 | 0.01 |
| g__Chloroplast_unclassified      | 0.23 | 1.23 | 0.67 | 0.01 |
| g__Falsirhodobacter              | 0.02 | 0.29 | 0.14 | 0.02 |
| g__Erysipelatoclostridium        | 0.01 | 0.16 | 0.02 | 0.02 |
| g__Lutispora                     | 0.00 | 0.05 | 0.01 | 0.02 |
| g__Sanguibacter                  | 0.01 | 0.11 | 0.01 | 0.03 |
| g__Flavisolibacter               | 0.00 | 0.06 | 0.02 | 0.03 |
| g__Christensenellaceae_R-7_group | 0.01 | 0.00 | 0.00 | 0.03 |
| g__Ramlibacter                   | 0.00 | 0.05 | 0.03 | 0.03 |
| g__Sphingopyxis                  | 0.00 | 0.03 | 0.02 | 0.03 |
| g__Legionella                    | 0.07 | 0.00 | 0.00 | 0.03 |

|                                 |            |                     |                     |      |
|---------------------------------|------------|---------------------|---------------------|------|
| g__Acidovorax                   | 0.01       | 0.07                | 0.04                | 0.04 |
| g__Subgroup_7_unclassified      | 0.01       | 0.08                | 0.03                | 0.04 |
| g__Parabacteroides              | 0.00       | 0.00                | 0.02                | 0.04 |
| g__Corynebacterium_1            | 0.01       | 0.09                | 0.08                | 0.04 |
| g__Curtobacterium               | 0.02       | 0.22                | 0.02                | 0.04 |
| g__Candidatus_Saccharimonas     | 0.01       | 0.00                | 0.00                | 0.05 |
|                                 | mean_HFm_c | mean_Anti_HFg_HFm_c | mean_Anti_LFg_HFm_c |      |
| g__Prevotellaceae_UCG-001       | 3.91       | 0.00                | 0.01                | 0.00 |
| g__Bacteroides                  | 1.86       | 14.60               | 15.69               | 0.00 |
| g__Fusobacterium                | 0.00       | 0.27                | 0.00                | 0.01 |
| g__Lachnospiraceae_NC2004_group | 0.02       | 0.00                | 0.00                | 0.01 |
| g__Enterorhabdus                | 0.75       | 2.37                | 4.24                | 0.01 |
| g__Subgroup_6_unclassified      | 0.00       | 0.02                | 0.02                | 0.01 |
| g__Rhodococcus                  | 0.01       | 0.04                | 0.02                | 0.01 |
| g__Muribaculaceae_unclassified  | 3.41       | 21.06               | 17.98               | 0.01 |
| g__Rikenellaceae_RC9_gut_group  | 0.10       | 0.00                | 0.00                | 0.02 |
| g__Acidovorax                   | 0.00       | 0.02                | 0.02                | 0.02 |
| g__Desulfovibrio                | 1.64       | 0.95                | 0.01                | 0.02 |
| g__Eggerthella                  | 0.01       | 0.09                | 0.00                | 0.02 |
| g__Eubacterium]_brachy_group    | 0.06       | 0.02                | 0.25                | 0.02 |
| g__Helicobacter                 | 0.20       | 0.76                | 0.15                | 0.02 |
| g__Erysipelatoclostridium       | 0.02       | 2.14                | 0.58                | 0.02 |
| g__Pseudomonas                  | 0.01       | 0.06                | 0.03                | 0.02 |
| g__Butyricimonas                | 0.00       | 0.36                | 0.10                | 0.02 |
| g__Clostridium                  | 0.94       | 2.77                | 1.08                | 0.02 |
| g__Hungatella                   | 0.01       | 0.96                | 0.00                | 0.03 |

|                                         |            |                     |                     |      |
|-----------------------------------------|------------|---------------------|---------------------|------|
| g__Bradyrhizobium                       | 0.00       | 0.01                | 0.01                | 0.03 |
| g__Family_XIII_UCG-001                  | 0.02       | 0.00                | 0.00                | 0.03 |
| g__Lachnoclostridium                    | 0.01       | 0.15                | 0.01                | 0.03 |
| g__Bilophila                            | 0.06       | 0.13                | 0.39                | 0.03 |
| g__Novosphingobium                      | 0.01       | 0.07                | 0.08                | 0.03 |
| g__Pantoea                              | 0.00       | 0.03                | 0.01                | 0.03 |
| g__Sandaracinobacter                    | 0.02       | 0.07                | 0.07                | 0.03 |
| g__Dechloromonas                        | 0.00       | 0.01                | 0.01                | 0.03 |
| g__Alistipes                            | 0.59       | 0.41                | 1.36                | 0.03 |
| g__Negativibacillus                     | 0.02       | 0.01                | 0.00                | 0.04 |
| g__Brevundimonas                        | 0.29       | 1.03                | 1.15                | 0.04 |
| g__Ruminococcus                         | 1.27       | 1.21                | 0.26                | 0.04 |
| g__A2                                   | 0.09       | 0.01                | 0.01                | 0.04 |
| g__Christensenellaceae_unclassified     | 0.06       | 0.01                | 0.01                | 0.04 |
| g__Devosia                              | 0.01       | 0.03                | 0.02                | 0.05 |
| g__Acinetobacter                        | 0.02       | 0.07                | 0.06                | 0.05 |
| g__Chloroplast_unclassified             | 0.02       | 0.06                | 0.08                | 0.05 |
| g__Papillibacter                        | 0.46       | 0.06                | 0.10                | 0.05 |
|                                         | mean_LFm_s | mean_Anti_HFg_LFm_s | mean_Anti_LFg_LFm_s |      |
| g__Candidatus_Saccharimonas             | 0.13       | 0.00                | 0.00                | 0.01 |
| g__Bifidobacterium                      | 0.00       | 1.44                | 0.98                | 0.02 |
| g__Desulfovibrio                        | 1.94       | 0.01                | 0.01                | 0.02 |
| g__Eubacterium]_coprostanoligenes_group | 0.00       | 0.05                | 0.11                | 0.03 |
| g__Lachnospiraceae_unclassified         | 0.01       | 0.07                | 0.25                | 0.04 |
| g__Ruminococcus_1                       | 0.00       | 0.04                | 0.06                | 0.05 |
|                                         | mean_LFm_c | mean_Anti_HFg_LFm_c | mean_Anti_LFg_LFm_c |      |

|                                 |                 |                     |                     |      |
|---------------------------------|-----------------|---------------------|---------------------|------|
| g__Desulfovibrio                | 4.11            | 0.38                | 0.01                | 0.01 |
| g__Alistipes                    | 2.43            | 1.68                | 0.12                | 0.01 |
| g__Helicobacter                 | 0.82            | 4.94                | 0.05                | 0.01 |
| g__Ruminococcaceae_UCG-014      | 5.29            | 0.47                | 5.68                | 0.01 |
| g__Ruminococcaceae_UCG-010      | 0.04            | 0.00                | 0.06                | 0.01 |
| g__Ruminococcaceae_UCG-005      | 0.04            | 0.00                | 0.02                | 0.01 |
| g__Mollicutes_RF39_unclassified | 0.15            | 0.01                | 0.03                | 0.03 |
| g__GCA-900066225                | 0.05            | 0.12                | 0.28                | 0.04 |
| g__Bilophila                    | 0.02            | 0.68                | 0.11                | 0.05 |
|                                 | mean_Anti_HFm_s | mean_Anti_HFg_HFm_s | mean_Anti_LFg_HFm_s |      |
| g__Aeromicrobium                | 0.01            | 0.04                | 0.00                | 0.00 |
| g__SWB02                        | 0.09            | 0.06                | 0.01                | 0.01 |
| g__Clostridium_sensu_stricto_8  | 0.13            | 0.06                | 0.02                | 0.01 |
| g__Brevundimonas                | 14.87           | 12.13               | 2.96                | 0.01 |
| g__Devosia                      | 0.30            | 0.50                | 0.07                | 0.01 |
| g__Corynebacterium              | 0.02            | 0.39                | 0.27                | 0.02 |
| g__Paenibacillus                | 0.00            | 0.04                | 0.00                | 0.02 |
| g__Microbacterium               | 0.06            | 0.16                | 0.03                | 0.02 |
| g__Enterococcus                 | 0.65            | 0.02                | 0.05                | 0.02 |
| g__Pseudoclavibacter            | 0.03            | 0.10                | 0.01                | 0.02 |
| g__Dechloromonas                | 0.13            | 0.11                | 0.02                | 0.03 |
| g__Parabacteroides              | 0.13            | 0.00                | 0.02                | 0.03 |
| g__Sandaracinobacter            | 0.61            | 0.63                | 0.15                | 0.03 |
| g__Paracoccus                   | 0.06            | 0.20                | 0.02                | 0.03 |
| g__Fronidihabitans              | 0.61            | 1.54                | 0.28                | 0.03 |
| g__Pseudomonas                  | 0.49            | 0.47                | 0.16                | 0.03 |

|                                                       |                 |                     |                     |        |
|-------------------------------------------------------|-----------------|---------------------|---------------------|--------|
| g__Methylobacterium                                   | 0.46            | 0.97                | 0.28                | 0.03   |
| g__Rathayibacter                                      | 0.09            | 0.18                | 0.05                | 0.03   |
| g__Saccharimonadaceae_unclassified                    | 0.13            | 0.25                | 0.06                | 0.04   |
| g__Mitochondria_unclassified                          | 0.21            | 0.21                | 0.07                | 0.04   |
| g__Lutispora                                          | 0.10            | 0.05                | 0.01                | 0.04   |
| g__Prevotellaceae_UCG-001                             | 3.02            | 0.01                | 0.06                | 0.04   |
| g__Novosphingobium                                    | 0.22            | 0.29                | 0.10                | 0.04   |
| g__Alloprevotella                                     | 0.02            | 0.00                | 0.00                | 0.05   |
| g__Allorhizobium-Neorhizobium-Pararhizobium-Rhizobium | 0.54            | 1.16                | 0.23                | 0.05   |
| g__Curtobacterium                                     | 0.11            | 0.22                | 0.02                | 0.05   |
|                                                       | mean_Anti_HFm_c | mean_Anti_HFg_HFm_c | mean_Anti_LFg_HFm_c |        |
| g__Prevotellaceae_UCG-001                             | 3.8594          | 0.0031              | 0.0067              | 0.0038 |
| g__Escherichia-Shigella                               | 1.1851          | 0.0081              | 0.0026              | 0.0042 |
| g__Streptococcus                                      | 0.0346          | 0.3492              | 9.2731              | 0.0044 |
| g__Hungatella                                         | 1.4019          | 0.9597              | 0.0011              | 0.0051 |
| g__Akkermansia                                        | 48.5571         | 4.7596              | 4.2369              | 0.0057 |
| g__Enterorhabdus                                      | 0.3028          | 2.3705              | 4.2382              | 0.0057 |
| g__Enterococcus                                       | 3.592           | 0.0734              | 0.0092              | 0.0063 |
| g__Chloroplast_unclassified                           | 0.0039          | 0.0636              | 0.0827              | 0.0085 |
| g__Ruminococcus                                       | 0.0038          | 1.212               | 0.2572              | 0.0091 |
| g__Clostridiales_vadinBB60_group_unclassified         | 0.0184          | 0.7527              | 0.8628              | 0.0093 |
| g__Coprobacillus                                      | 4.2169          | 1.7402              | 0.0054              | 0.0108 |
| g__Curvibacter                                        | 0.0107          | 0.0739              | 0.0546              | 0.0108 |
| g__Acinetobacter                                      | 0.0049          | 0.0743              | 0.064               | 0.0122 |
| g__Rhodococcus                                        | 0.0061          | 0.0443              | 0.0184              | 0.0122 |
| g__Ruminococcaceae_UCG-013                            | 0.001           | 0.1467              | 0.4193              | 0.0132 |

|                                                       |        |         |        |        |
|-------------------------------------------------------|--------|---------|--------|--------|
| g__Allorhizobium-Neorhizobium-Pararhizobium-Rhizobium | 0.0048 | 0.0904  | 0.0488 | 0.0135 |
| g__Acidovorax                                         | 0.0007 | 0.0151  | 0.0164 | 0.0151 |
| g__Pseudomonas                                        | 0.0065 | 0.0574  | 0.0295 | 0.016  |
| g__Dorea                                              | 0.0016 | 0.1873  | 0.0415 | 0.0166 |
| g__Eggerthella                                        | 0.0006 | 0.0934  | 0.0032 | 0.0168 |
| g__Parasutterella                                     | 3.4098 | 0.2348  | 0.0979 | 0.0169 |
| g__Clostridium]_innocuum_group                        | 0.2582 | 0.2508  | 0.0036 | 0.0207 |
| g__Ruminiclostridium                                  | 0.0018 | 0.1898  | 0.0839 | 0.0207 |
| g__Ralstonia                                          | 0.0304 | 0.3286  | 0.188  | 0.0211 |
| g__Subgroup_6_unclassified                            | 0.0032 | 0.018   | 0.0247 | 0.0228 |
| g__Novosphingobium                                    | 0.0038 | 0.0744  | 0.0811 | 0.023  |
| g__Sandaracinobacter                                  | 0.0186 | 0.0706  | 0.0734 | 0.0233 |
| g__Alistipes                                          | 0.3319 | 0.4053  | 1.3616 | 0.0239 |
| g__Eubacterium]_brachy_group                          | 0.0368 | 0.0227  | 0.2455 | 0.0247 |
| g__Clostridium                                        | 0.8927 | 2.7716  | 1.0759 | 0.0249 |
| g__GCA-900066225                                      | 0.0019 | 0.1814  | 0.2031 | 0.0253 |
| g__Rikenellaceae_RC9_gut_group                        | 0.1295 | 0.0006  | 0.0014 | 0.0254 |
| g__Ruminococcaceae_UCG-004                            | 0.0045 | 0.1026  | 0.1779 | 0.0283 |
| g__Methylobacterium                                   | 0.0077 | 0.0606  | 0.042  | 0.0305 |
| g__Erysipelatoclostridium                             | 0.0156 | 2.1402  | 0.5815 | 0.0322 |
| g__Aureimonas                                         | 0.001  | 0.0301  | 0.0068 | 0.0335 |
| g__Devosia                                            | 0.0048 | 0.0331  | 0.0247 | 0.034  |
| g__unclassified                                       | 3.8251 | 13.6001 | 9.7211 | 0.0353 |
| g__Brevundimonas                                      | 0.2263 | 1.0309  | 1.1514 | 0.0384 |
| g__Eubacterium]_coprostanoligenes_group               | 0.027  | 0.6291  | 0.2142 | 0.0408 |
| g__Frondihabitans                                     | 0.0082 | 0.1005  | 0.0632 | 0.0453 |

g\_\_Intestinimonas

0.0863

0.6416

0.4071

0.0464

---



**Table S3. Ingredients and nutrient composition of the HFg and LFg groups on a dry matter (DM) basis**

| Item                             | Treatment |       |
|----------------------------------|-----------|-------|
|                                  | HFg       | LFg   |
| Ingredient, %                    |           |       |
| Corn silage                      | 27.74     | 28.20 |
| Alfalfa hay                      | 42.26     | 1.80  |
| Corn                             | 15.00     | 35.00 |
| Corn germ meal                   | 4.10      | 9.58  |
| Corn gluten feed                 | 7.50      | 17.50 |
| Cottonseed meal                  | 1.89      | 4.39  |
| Calcium phosphate                | 0.11      | 0.26  |
| Limestone                        | 0.68      | 1.59  |
| Salt                             | 0.24      | 0.56  |
| Vitamin-mineral mix <sup>1</sup> | 0.18      | 0.42  |
| Sodium Bicarbonate               | 0.30      | 0.70  |
| Nutrient composition             |           |       |
| DM <sup>2</sup> , %              | 52.16     | 51.64 |
| NE <sub>L</sub> , MJ/kg          | 6.58      | 7.58  |
| ADF, %                           | 21.6      | 12.33 |
| NDF, %                           | 31.3      | 21.35 |
| CP, %                            | 16.4      | 10.56 |
| Starch, %                        | 28.4      | 54.53 |

<sup>1</sup> Vitamin-mineral mix (per kilogram): 450 mg of nicotinic acid, 600 mg of Mn, 950 mg of Zn, 430 mg of Fe, 650 mg of Cu, 30 mg of Se, 45 mg of I, 20 mg of Co, 800 mg of vitamin E, 45,000 IU of vitamin D, and 120,000 IU of vitamin A.

<sup>2</sup> DM, dry matter; NE<sub>L</sub>, net energy of lactation; ADF, acid detergent fibre; NDF, neutral detergent fibre; and CP, crude protein.

**Table S4 The statistics of obtained sequences data of 16S RNA gene sequencing in the present study.**

| Group name                         | Sample          | Raw_Tags | Raw_Bases | Valid_Tags | Valid_Bases | Valid% | Q20%  | Q30%  | GC%   |
|------------------------------------|-----------------|----------|-----------|------------|-------------|--------|-------|-------|-------|
| Mice 16S rRNA gene sequencing data |                 |          |           |            |             |        |       |       |       |
| HFm_s                              | HFm_s1          | 84353    | 42.18M    | 79973      | 34.03M      | 94.81  | 97.75 | 93.26 | 51.57 |
|                                    | HFm_s2          | 84561    | 42.28M    | 78137      | 33.23M      | 92.40  | 96.92 | 91.19 | 51.35 |
|                                    | HFm_s3          | 87493    | 43.75M    | 84014      | 35.80M      | 96.02  | 97.97 | 93.80 | 51.12 |
|                                    | HFm_s4          | 81302    | 40.65M    | 78681      | 33.56M      | 96.78  | 98.07 | 94.06 | 51.26 |
|                                    | HFm_s5          | 81368    | 40.68M    | 74956      | 31.97M      | 92.12  | 96.71 | 90.75 | 51.82 |
|                                    | HFm_s6          | 83699    | 41.85M    | 73299      | 31.19M      | 87.57  | 98.00 | 93.94 | 51.65 |
| LFm_s                              | LFm_s1          | 87010    | 43.51M    | 70965      | 30.27M      | 81.56  | 97.48 | 92.81 | 50.87 |
|                                    | LFm_s2          | 82114    | 41.06M    | 70081      | 29.84M      | 85.35  | 97.61 | 93.17 | 51.46 |
|                                    | LFm_s3          | 81836    | 40.92M    | 67247      | 28.66M      | 82.17  | 96.53 | 90.70 | 50.63 |
|                                    | LFm_s4          | 87869    | 43.93M    | 73447      | 31.31M      | 83.59  | 97.48 | 92.66 | 51.23 |
|                                    | LFm_s5          | 85010    | 42.51M    | 69625      | 29.61M      | 81.90  | 97.25 | 92.24 | 51.36 |
|                                    | LFm_s6          | 80700    | 40.35M    | 71925      | 30.47M      | 89.13  | 97.46 | 92.69 | 51.56 |
| Anti_HFm_s                         | Anti_HFm_s1     | 84254    | 42.13M    | 81663      | 34.28M      | 96.92  | 97.82 | 93.47 | 51.66 |
|                                    | Anti_HFm_s2     | 86487    | 43.24M    | 81325      | 33.89M      | 94.03  | 97.80 | 93.36 | 53.34 |
|                                    | Anti_HFm_s3     | 81094    | 40.55M    | 78803      | 32.78M      | 97.17  | 98.09 | 94.11 | 52.22 |
|                                    | Anti_HFm_s4     | 80015    | 40.01M    | 74956      | 31.40M      | 93.68  | 96.84 | 90.90 | 52.99 |
|                                    | Anti_HFm_s5     | 83872    | 41.94M    | 81051      | 33.88M      | 96.64  | 98.08 | 94.14 | 52.18 |
| Anti_HFg_HFm_s                     | Anti_HFg_HFm_s1 | 81708    | 40.85M    | 79596      | 33.47M      | 97.42  | 97.98 | 93.87 | 51.93 |
|                                    | Anti_HFg_HFm_s2 | 81859    | 40.93M    | 76008      | 32.07M      | 92.85  | 94.53 | 85.64 | 51.96 |
|                                    | Anti_HFg_HFm_s3 | 86390    | 43.20M    | 84174      | 35.36M      | 97.43  | 97.99 | 93.64 | 52.44 |
|                                    | Anti_HFg_HFm_s4 | 84706    | 42.35M    | 82220      | 34.90M      | 97.07  | 97.67 | 92.91 | 51.18 |
|                                    | Anti_HFg_HFm_s5 | 84866    | 42.43M    | 82608      | 34.38M      | 97.34  | 97.81 | 93.27 | 52.36 |
|                                    | Anti_HFg_HFm_s6 | 86974    | 43.49M    | 80506      | 33.78M      | 92.56  | 91.39 | 79.39 | 52.56 |

|                |                 |       |        |       |        |       |       |       |       |
|----------------|-----------------|-------|--------|-------|--------|-------|-------|-------|-------|
| Anti_LFg_HFm_s | Anti_LFg_HFm_s1 | 83230 | 41.62M | 78990 | 33.51M | 94.91 | 94.37 | 85.11 | 51.57 |
|                | Anti_LFg_HFm_s2 | 84692 | 42.35M | 82438 | 35.07M | 97.34 | 97.60 | 92.61 | 51.10 |
|                | Anti_LFg_HFm_s3 | 83004 | 41.50M | 80482 | 34.27M | 96.96 | 97.91 | 93.53 | 51.63 |
|                | Anti_LFg_HFm_s4 | 86374 | 43.19M | 83135 | 35.24M | 96.25 | 95.36 | 87.60 | 52.28 |
|                | Anti_LFg_HFm_s5 | 83326 | 41.66M | 81005 | 34.49M | 97.21 | 97.90 | 93.67 | 51.91 |
|                | Anti_LFg_HFm_s6 | 87098 | 43.55M | 84916 | 36.00M | 97.49 | 97.68 | 93.18 | 52.14 |
| HFm_c          | HFm_c1          | 87894 | 43.95M | 81368 | 34.62M | 92.58 | 97.53 | 92.84 | 51.63 |
|                | HFm_c2          | 85886 | 42.94M | 74823 | 30.87M | 87.12 | 98.00 | 93.88 | 53.02 |
|                | HFm_c3          | 82841 | 41.42M | 73530 | 30.41M | 88.76 | 95.91 | 88.80 | 53.12 |
|                | HFm_c4          | 85055 | 42.53M | 74382 | 30.52M | 87.45 | 98.15 | 94.26 | 53.87 |
|                | HFm_c5          | 81940 | 40.97M | 72380 | 29.72M | 88.33 | 97.95 | 93.86 | 54.09 |
|                | HFm_c6          | 83691 | 41.85M | 71682 | 29.12M | 85.65 | 97.00 | 91.25 | 54.26 |
| LFm_c          | LFm_c1          | 84449 | 42.22M | 66980 | 28.08M | 79.31 | 97.64 | 93.14 | 51.94 |
|                | LFm_c2          | 80346 | 40.17M | 69723 | 29.05M | 86.78 | 97.45 | 92.68 | 54.27 |
|                | LFm_c3          | 86923 | 43.46M | 73922 | 30.91M | 85.04 | 96.23 | 89.92 | 52.56 |
|                | LFm_c4          | 81212 | 40.61M | 68741 | 28.80M | 84.64 | 97.70 | 93.18 | 53.11 |
|                | LFm_c5          | 86110 | 43.05M | 72175 | 29.78M | 83.82 | 97.60 | 93.04 | 54.12 |
| Anti_HFm_c     | Anti_HFm_c1     | 83023 | 41.51M | 78972 | 32.33M | 95.12 | 97.73 | 93.22 | 54.11 |
|                | Anti_HFm_c2     | 82098 | 41.05M | 74450 | 30.77M | 90.68 | 98.01 | 93.77 | 53.23 |
|                | Anti_HFm_c3     | 80636 | 40.32M | 71217 | 29.75M | 88.32 | 97.78 | 93.29 | 52.05 |
|                | Anti_HFm_c4     | 82937 | 41.47M | 66681 | 27.65M | 80.40 | 97.86 | 93.62 | 52.89 |
|                | Anti_HFm_c5     | 83714 | 41.86M | 73933 | 30.78M | 88.32 | 97.87 | 93.50 | 53.42 |
| Anti_HFg_HFm_c | Anti_HFg_HFm_c1 | 86082 | 43.04M | 75145 | 31.23M | 87.29 | 92.22 | 81.10 | 52.29 |
|                | Anti_HFg_HFm_c2 | 84566 | 42.28M | 73837 | 30.73M | 87.31 | 96.62 | 90.31 | 51.23 |
|                | Anti_HFg_HFm_c3 | 80930 | 40.47M | 75444 | 31.13M | 93.22 | 98.06 | 94.00 | 53.32 |
|                | Anti_HFg_HFm_c4 | 81725 | 40.86M | 76690 | 31.96M | 93.84 | 97.93 | 93.63 | 53.89 |

|                |                 |       |        |       |        |       |       |       |       |
|----------------|-----------------|-------|--------|-------|--------|-------|-------|-------|-------|
|                | Anti_HFg_HFm_c5 | 82011 | 41.01M | 74779 | 30.72M | 91.18 | 96.77 | 90.64 | 52.29 |
|                | Anti_HFg_HFm_c6 | 82552 | 41.28M | 71382 | 29.47M | 86.47 | 97.94 | 93.70 | 53.56 |
| Anti_LFg_HFm_c | Anti_LFg_HFm_c1 | 85721 | 42.86M | 77328 | 32.26M | 90.21 | 97.79 | 93.39 | 52.75 |
|                | Anti_LFg_HFm_c2 | 82594 | 41.30M | 70353 | 29.14M | 85.18 | 97.83 | 93.58 | 52.80 |
|                | Anti_LFg_HFm_c3 | 83986 | 41.99M | 70517 | 29.57M | 83.96 | 97.86 | 93.48 | 52.56 |
|                | Anti_LFg_HFm_c4 | 83635 | 41.82M | 76667 | 31.53M | 91.67 | 96.45 | 89.86 | 52.56 |
|                | Anti_LFg_HFm_c5 | 86531 | 43.27M | 73452 | 30.49M | 84.89 | 97.90 | 93.68 | 53.07 |
|                | Anti_LFg_HFm_c6 | 82885 | 41.44M | 76044 | 31.98M | 91.75 | 97.79 | 93.38 | 51.78 |
| Anti_HFg_LFm_s | Anti_HFg_LFm_s1 | 82415 | 41.21M | 78533 | 33.43M | 95.29 | 97.48 | 92.69 | 51.10 |
|                | Anti_HFg_LFm_s2 | 81356 | 40.68M | 78095 | 33.25M | 95.99 | 96.96 | 91.46 | 50.91 |
|                | Anti_HFg_LFm_s3 | 80727 | 40.36M | 77807 | 33.12M | 96.38 | 97.31 | 92.27 | 50.89 |
|                | Anti_HFg_LFm_s4 | 85189 | 42.59M | 75105 | 31.89M | 88.16 | 97.74 | 93.40 | 52.11 |
|                | Anti_HFg_LFm_s5 | 85538 | 42.77M | 76205 | 31.71M | 89.09 | 95.87 | 88.64 | 52.61 |
|                | Anti_HFg_LFm_s6 | 85217 | 42.61M | 70657 | 29.82M | 82.91 | 98.00 | 93.94 | 53.24 |
| Anti_LFg_LFm_s | Anti_LFg_LFm_s1 | 81700 | 40.85M | 69870 | 29.82M | 85.52 | 96.09 | 89.21 | 51.20 |
|                | Anti_LFg_LFm_s2 | 85202 | 42.60M | 73758 | 31.06M | 86.57 | 97.82 | 93.50 | 52.10 |
|                | Anti_LFg_LFm_s3 | 85306 | 42.65M | 78250 | 32.50M | 91.73 | 97.91 | 93.65 | 54.56 |
|                | Anti_LFg_LFm_s4 | 84519 | 42.26M | 79103 | 33.44M | 93.59 | 97.40 | 92.53 | 51.73 |
|                | Anti_LFg_LFm_s5 | 85455 | 42.73M | 73106 | 30.57M | 85.55 | 97.65 | 93.18 | 53.00 |
|                | Anti_LFg_LFm_s6 | 86313 | 43.16M | 77489 | 32.59M | 89.78 | 97.16 | 91.91 | 51.91 |
| Anti_HFg_LFm_c | Anti_HFg_LFm_c1 | 80006 | 40.00M | 67002 | 27.98M | 83.75 | 94.96 | 86.91 | 52.70 |
|                | Anti_HFg_LFm_c2 | 87002 | 43.50M | 77827 | 32.51M | 89.45 | 97.06 | 91.51 | 54.54 |
|                | Anti_HFg_LFm_c3 | 80748 | 40.37M | 69985 | 29.03M | 86.67 | 97.62 | 93.03 | 54.47 |
|                | Anti_HFg_LFm_c4 | 85844 | 42.92M | 71213 | 29.51M | 82.96 | 97.88 | 93.65 | 54.33 |
|                | Anti_HFg_LFm_c5 | 80138 | 40.07M | 70209 | 28.83M | 87.61 | 97.84 | 93.56 | 54.04 |
|                | Anti_HFg_LFm_c6 | 84633 | 42.32M | 75889 | 31.03M | 89.67 | 92.36 | 81.73 | 53.68 |

|                                    |                 |       |        |       |        |       |       |       |       |
|------------------------------------|-----------------|-------|--------|-------|--------|-------|-------|-------|-------|
| Anti_LFg_LFm_c                     | Anti_LFg_LFm_c1 | 82645 | 41.32M | 66859 | 28.15M | 80.90 | 97.55 | 92.90 | 53.45 |
|                                    | Anti_LFg_LFm_c2 | 82911 | 41.46M | 70487 | 28.88M | 85.02 | 96.45 | 90.27 | 53.84 |
|                                    | Anti_LFg_LFm_c3 | 85887 | 42.94M | 72180 | 30.29M | 84.04 | 97.89 | 93.72 | 54.16 |
|                                    | Anti_LFg_LFm_c4 | 83720 | 41.86M | 69159 | 28.58M | 82.61 | 97.74 | 93.52 | 53.32 |
|                                    | Anti_LFg_LFm_c5 | 83385 | 41.69M | 68182 | 27.97M | 81.77 | 97.75 | 93.46 | 53.64 |
|                                    | Anti_LFg_LFm_c6 | 86689 | 43.34M | 78437 | 31.93M | 90.48 | 96.62 | 90.48 | 53.73 |
| Goat 16S rRNA gene sequencing data |                 |       |        |       |        |       |       |       |       |
| HFg                                | HFg1            | 86406 | 43.20M | 74788 | 31.16M | 86.55 | 97.75 | 93.30 | 53.36 |
|                                    | HFg2            | 83558 | 41.78M | 72602 | 30.35M | 86.89 | 97.84 | 93.54 | 53.15 |
|                                    | HFg3            | 83408 | 41.70M | 72281 | 30.18M | 86.66 | 97.5  | 92.78 | 52.79 |
|                                    | HFg4            | 83675 | 41.84M | 73229 | 30.49M | 87.52 | 97.89 | 93.74 | 53.02 |
|                                    | HFg5            | 86329 | 43.16M | 76553 | 31.92M | 88.68 | 97.74 | 93.35 | 53.15 |
|                                    | HFg6            | 81956 | 40.98M | 72689 | 30.33M | 88.69 | 97.92 | 93.79 | 53.39 |
| LFg                                | LFg1            | 81971 | 40.99M | 63383 | 26.09M | 77.32 | 95.59 | 88.25 | 52.75 |
|                                    | LFg2            | 83886 | 41.94M | 68940 | 28.64M | 82.18 | 96.73 | 90.58 | 52.65 |
|                                    | LFg3            | 84706 | 42.35M | 72798 | 29.82M | 85.94 | 97.75 | 93.39 | 53.02 |
|                                    | LFg4            | 85030 | 42.52M | 74607 | 30.73M | 87.74 | 96.38 | 90.01 | 52.80 |
|                                    | LFg5            | 83282 | 41.64M | 73855 | 30.07M | 88.68 | 97.97 | 93.96 | 52.57 |
|                                    | LFg6            | 84517 | 42.26M | 76892 | 31.39M | 90.98 | 97.36 | 92.32 | 53.08 |
